# Supplementary material for: Spatial Distribution, Potential Sources, and Health Risk of Polycyclic Aromatic Hydrocarbons (PAHs) in the Surface Soils under Different Land-Use Covers of Shanxi Province, North China
Source: MDPI journal article supplement (doi:10.3390/ijerph191911949), 2022-09-21
Supplement: s1 [file s1]

## SUPPLEMENTARY INFORMATION

### Health risk assessment method

BaP toxic equivalent concentration ( $BaP_{eq}$ ), a common evaluation method, was applied to assess the health risk of PAHs in many studies (Table S1).

$$BaP_{eq} = \sum_i^n C_i \times TEF_i \quad (1)$$

where  $C_i$  is the concentration of  $i$ th PAH,  $n$  is the number of individual PAH,  $TEF_i$  is the corresponding toxicity equivalent factor (TEF) of  $i$ th PAH.

**Table S1.** Toxic equivalent concentration ( $BaP_{eq}$ ) of PAHs in soil of Shanxi Province.

| PAHs             | Limit value (ng/g) |         | $BaP_{eq}$ (ng/g) |         |      |
|------------------|--------------------|---------|-------------------|---------|------|
|                  |                    | $TEF_i$ | Minimum           | Maximum | Mean |
| Nap              | 15                 | 0.001   | 0.00              | 0.09    | 0.02 |
| Acy              |                    | 0.001   | 0.00              | 0.05    | 0.00 |
| Ace              |                    | 0.001   | 0.00              | 0.17    | 0.00 |
| Flu              |                    | 0.001   | 0.00              | 0.05    | 0.01 |
| Phe              | 50                 | 0.001   | 0.01              | 0.52    | 0.04 |
| Ant              | 50                 | 0.01    | 0.00              | 0.84    | 0.05 |
| Fla              | 15                 | 0.001   | 0.00              | 1.11    | 0.04 |
| Pyr              |                    | 0.001   | 0.00              | 0.83    | 0.03 |
| Baa <sup>c</sup> | 20                 | 0.1     | 0.12              | 60.64   | 1.89 |
| Chr <sup>c</sup> | 20                 | 0.01    | 0.02              | 5.31    | 0.26 |

|                      |    |      |      |        |       |
|----------------------|----|------|------|--------|-------|
| Bbf <sup>c</sup>     |    | 0.1  | 0.23 | 95.49  | 3.89  |
| Bkf <sup>c</sup>     | 25 | 0.1  | 0.10 | 42.80  | 1.44  |
| Bap <sup>c</sup>     | 25 | 1    | 0.62 | 549.54 | 15.74 |
| Icdp <sup>c</sup>    | 25 | 0.1  | 0.09 | 42.09  | 1.51  |
| Daa <sup>c</sup>     |    | 1    | 0.18 | 171.22 | 5.70  |
| Bgp                  | 20 | 0.01 | 0.01 | 4.38   | 0.19  |
| Σ7 <sup>c</sup> PAHs |    |      | 0.96 | 180.40 | 20.57 |
| Σ16PAHs              |    |      | 1.02 | 184.00 | 21.09 |

<sup>c</sup> Carcinogenic PAHs.

The carcinogenic risk (CR) of soil PAHs was calculated by three pathways including accidental ingestion, skin contact, and respiratory ingestion. The cancer risk calculation formula of these three ways is as equation (2)-(5):

$$CR_{ingestion} = \frac{C_{PAHs} \times IR_{soil} \times EF \times ED \times CF}{BW \times AT} \times CSF_{ingestion} \quad (2)$$

$$CR_{skin} = \frac{C_{PAHs} \times SA \times AF_{PAHs} \times ABS \times EF \times ED \times CF}{BW \times AT} \times CSF_{skin} \quad (3)$$

$$CR_{respiratory} = \frac{C_{PAHs} \times IR_{air} \times EF \times ED \times CF}{PEF \times BW \times AT} \times CSF_{respiratory} \quad (3)$$

$$CR = CR_{ingestion} + CR_{skin} + CR_{respiratory} \quad (5)$$

Where  $C_{PAHs}$  is the concentration of soil PAHs,  $IR$  is soil and air uptake rate,  $EF$  is exposure frequency,  $ED$  is exposure duration,  $CF$  is transformation factor ( $10^{-6}$  kg mg<sup>-1</sup>),  $BW$  is body weight,  $AT$  is average life span,  $CSF$  is the slope factor of accidental ingestion of cancer ( $CSF_{ingestion} = 7.3$  kg D<sup>-1</sup> mg<sup>-1</sup>,  $CSF_{skin} = 25$  kg D<sup>-1</sup> mg<sup>-1</sup>,  $CSF_{respiratory} = 3.9$  kg D<sup>-1</sup> mg<sup>-1</sup>),  $AF$  is skin adhesion factor,  $ABS$  is adsorption factor,  $PEF$  is soil particle emission factor. Parameters used in the cancer risk assessment is listed in Table S2.

**Table S2.** Parameters used in the cancer risk assessment.

| Parameters                                   | Male child          | Male youth          | Male adult          |
|----------------------------------------------|---------------------|---------------------|---------------------|
| $BW$ (kg)                                    | 17.2                | 47.1                | 62.8                |
| $EF$ (d year <sup>-1</sup> )                 | 350                 | 350                 | 350                 |
| $ED$ (year)                                  | 6                   | 14                  | 30                  |
| $IR_{air}$ (m <sup>3</sup> d <sup>-1</sup> ) | 7.6                 | 12.9                | 13.1                |
| $IR_{soil}$ (mg d <sup>-1</sup> )            | 100                 | 100                 | 50                  |
| $SA$ (cm <sup>2</sup> )                      | 1090                | 1900                | 2120                |
| $AF_{soil}$ (mg cm <sup>-2</sup> )           | 0.2                 | 0.2                 | 0.07                |
| $ABS$                                        | 0.13                | 0.13                | 0.13                |
| $AT$ (d)                                     | 25550               | 25550               | 25550               |
| $PEF$ (m <sup>3</sup> mg <sup>-1</sup> )     | 1.4×10 <sup>9</sup> | 1.4×10 <sup>9</sup> | 1.4×10 <sup>9</sup> |

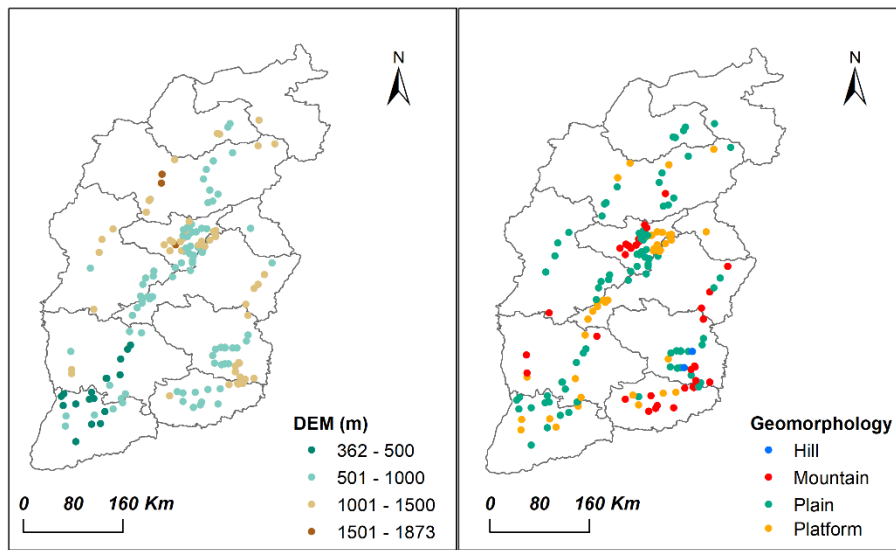

**Figure S1.** Altitude and geomorphology information of sampling sites.
